# Supplementary material for: The Application of Reference Dose Prediction Model to Human Health Water Quality Criteria and Risk Assessment
Source: MDPI journal article supplement (doi:10.3390/toxics11040318), 2023-03-28
Supplement: s1 [file s1]

Table S1. Parameters of health risk assessment in water environmental

| compounds | n   | Exposure concentration<br>(ng/L) |        | HQ value | AWQC<br>(μg/L) | References |
|-----------|-----|----------------------------------|--------|----------|----------------|------------|
|           |     | range                            | median |          |                |            |
| p-p'DDE   | 192 | 0.0020~138.9                     | 3.950  | 0.1279   | 0.03           | [38-43]    |
| α-HCH     | 254 | 0.0151~297.0                     | 2.200  | 0.0848   | 0.02           |            |

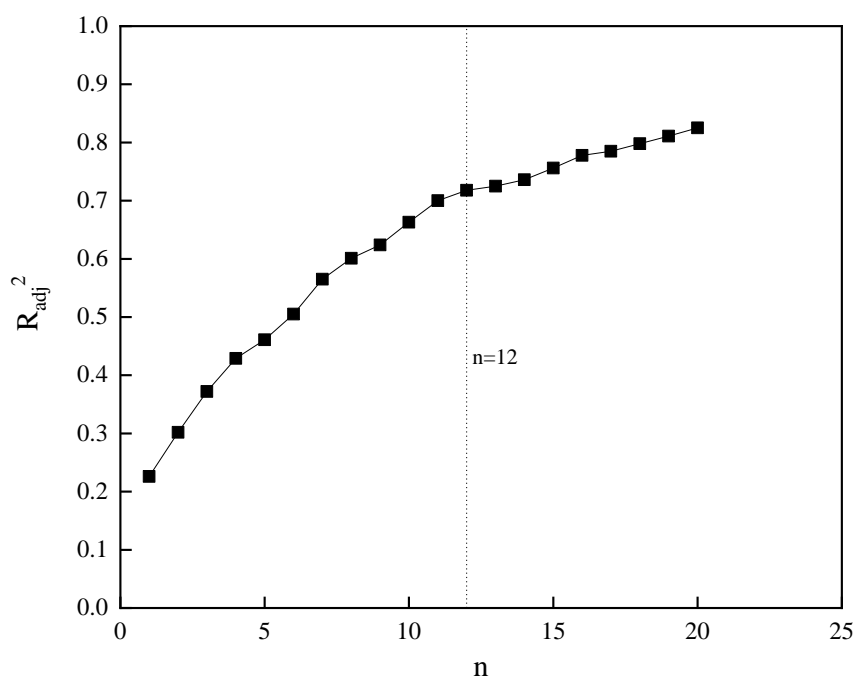

Figure S1. The relationship between  $R_{adj}^2$  and the number of molecular descriptors
